# Supplementary material
Source: publisher site journal article supplement (https://www.spandidos-publications.com/4918/downloadSupplementary)
Supplement: Supplementary file 1 [file downloadSupplementary]

Table SI. Comparison of patient's clinical characteristics and metabolic parameters between non-insulin-resistant and insulin-resistant groups among benign and malignant ovarian neoplasms (in the form of categorical data).

| Variable                                             | Benign neoplasms              |                           | P-value             | Malignant neoplasms           |                           | P-value             |
|------------------------------------------------------|-------------------------------|---------------------------|---------------------|-------------------------------|---------------------------|---------------------|
|                                                      | Non-IR<br>(HOMA-IR<br><1.208) | IR<br>(HOMA-IR<br>≥1.208) |                     | Non-IR<br>(HOMA-IR<br><1.208) | IR<br>(HOMA-IR<br>≥1.208) |                     |
| Young/old age (years)                                |                               |                           | 0.448 <sup>a</sup>  |                               |                           | 0.626 <sup>a</sup>  |
| Young (≤40)                                          | 9<br>(52.9%)                  | 7<br>(70.0%)              |                     | 6 (33.3%)                     | 1 (14.3%)                 |                     |
| Old (>40)                                            | 8<br>(47.1%)                  | 3<br>(30.0%)              |                     | 12<br>(66.7%)                 | 6 (85.7%)                 |                     |
| Marital status                                       |                               |                           | 0.613 <sup>a</sup>  |                               |                           | >0.999 <sup>a</sup> |
| Married                                              | 15<br>(88.2%)                 | 8<br>(80.0%)              |                     | 16<br>(88.9%)                 | 6 (85.7%)                 |                     |
| Unmarried                                            | 2<br>(11.8%)                  | 2<br>(20.0%)              |                     | 2 (11.1%)                     | 1 (14.3%)                 |                     |
| Parity status                                        |                               |                           | 0.039 <sup>a</sup>  |                               |                           | 0.640 <sup>a</sup>  |
| Non-parous                                           | 3<br>(17.6%)                  | 6<br>(60.0%)              |                     | 5 (27.8%)                     | 3 (42.9%)                 |                     |
| Parous                                               | 14<br>(82.4%)                 | 4<br>(40.0%)              |                     | 13<br>(72.2%)                 | 4 (57.1%)                 |                     |
| Menopausal status                                    |                               |                           | >0.999 <sup>a</sup> |                               |                           | 0.378 <sup>a</sup>  |
| Yes                                                  | 4<br>(23.5%)                  | 2<br>(20.0%)              |                     | 8 (44.4%)                     | 5 (71.4%)                 |                     |
| No                                                   | 13<br>(76.5%)                 | 8<br>(80.0%)              |                     | 10<br>(55.6%)                 | 2 (28.6%)                 |                     |
| Contraception type                                   |                               |                           | 0.124 <sup>a</sup>  |                               |                           | >0.999 <sup>a</sup> |
| None + non-hormonal                                  | 12<br>(70.6%)                 | 10<br>(100%)              |                     | 12<br>(66.7%)                 | 5 (71.4%)                 |                     |
| Hormonal                                             | 5<br>(29.4%)                  | 0                         |                     | 6 (33.3%)                     | 2 (28.6%)                 |                     |
| Ovarium side affected                                |                               |                           | 0.590 <sup>b</sup>  |                               |                           | 0.243 <sup>b</sup>  |
| Left side                                            | 4<br>(23.5%)                  | 1<br>(10.0%)              |                     | 4 (22.2%)                     | 4 (57.1%)                 |                     |
| Right side                                           | 3<br>(17.6%)                  | 3<br>(30.0%)              |                     | 9 (50.0%)                     | 2 (28.6%)                 |                     |
| Bilateral                                            | 10<br>(58.8%)                 | 6<br>(60.0%)              |                     | 5 (27.8%)                     | 1 (14.3%)                 |                     |
| SBP (mmHg)                                           |                               |                           | 0.682 <sup>b</sup>  |                               |                           | 0.484 <sup>b</sup>  |
| Normal (<130)                                        | 10<br>(58.8%)                 | 7<br>(70.0%)              |                     | 7 (38.9%)                     | 4 (57.1%)                 |                     |
| High-normal (130-139)                                | 6<br>(35.3%)                  | 2<br>(20.0%)              |                     | 4 (22.2%)                     | 0                         |                     |
| Grade I (140-159)                                    | 1 (5.9%)                      | 1<br>(10.0%)              |                     | 6 (33.3%)                     | 2 (28.6%)                 |                     |
| Grade II (≥160)                                      | 0                             | 0                         |                     | 1<br>(5.6%)                   | 1 (14.3%)                 |                     |
| DBP (mmHg)                                           |                               |                           | 0.346 <sup>b</sup>  |                               |                           | 0.396 <sup>b</sup>  |
| Normal (<85)                                         | 10<br>(58.8%)                 | 8<br>(80.0%)              |                     | 10<br>(55.6%)                 | 3 (42.8%)                 |                     |
| High-normal (85-89)                                  | 6<br>(35.3%)                  | 1<br>(10.0%)              |                     | 4 (22.2%)                     | 2 (28.6%)                 |                     |
| Grade I (90-99)                                      | 1<br>(5.9%)                   | 1<br>(10.0%)              |                     | 4 (22.2%)                     | 1 (14.3%)                 |                     |
| Grade II (≥100)                                      | 0                             | 0                         |                     | 0                             | 1 (14.3%)                 |                     |
| BMI Asia-Pacific classification (kg/m <sup>2</sup> ) |                               |                           | 0.362 <sup>b</sup>  |                               |                           | 0.879 <sup>b</sup>  |
| <18.5 (Underweight)                                  | 1                             | 3                         |                     | 8 (44.4%)                     | 3 (42.8%)                 |                     |

|                                           |               |              |                     |               |              |                    |
|-------------------------------------------|---------------|--------------|---------------------|---------------|--------------|--------------------|
|                                           | (5.9%)        | (30.0%)      |                     |               |              |                    |
| 18.5-22.9 (Normal)                        | 7<br>(41.2%)  | 3<br>(30.0%) |                     | 7 (38.9%)     | 2 (28.6%)    |                    |
| 23-24.9 (Overweight)                      | 6<br>(35.3%)  | 2<br>(20.0%) |                     | 1 (5.6%)      | 1 (14.3%)    |                    |
| ≥25 (Obese)                               | 3<br>(17.6%)  | 2<br>(20.0%) |                     | 2 (11.1%)     | 1<br>(14.3%) |                    |
| BMI class                                 |               |              | 0.695 <sup>a</sup>  |               |              | 0.597 <sup>a</sup> |
| Lower-class BMI (normal +<br>underweight) | 8<br>(47.1%)  | 6<br>(60.0%) |                     | 15<br>(83.3%) | 5 (71.4%)    |                    |
| Higher-class BMI (overweight<br>+ obese)  | 9<br>(52.9%)  | 4<br>(40.0%) |                     | 3 (16.7%)     | 2 (28.6%)    |                    |
| FPG (mg/dL)                               |               |              | 0.041 <sup>a</sup>  |               |              | 0.036 <sup>b</sup> |
| Normal (<100)                             | 17<br>(100%)  | 7<br>(70.0%) |                     | 15<br>(83.3%) | 3 (42.8%)    |                    |
| Moderate (100-125)                        | 0             | 3<br>(30.0%) |                     | 3 (16.7%)     | 2 (28.6%)    |                    |
| High (≥126)                               | 0             | 0            |                     | 0             | 2 (28.6%)    |                    |
| FIL (μIU/mL)                              |               |              | <0.001 <sup>a</sup> |               |              | 0.015 <sup>a</sup> |
| Normal (<7)                               | 17<br>(100%)  | 3<br>(30.0%) |                     | 18 (100%)     | 0            |                    |
| IR (≥7)                                   | 0             | 7<br>(70.0%) |                     | 0             | 7<br>(100%)  |                    |
| HOMA-β (%)                                |               |              | 0.067 <sup>b</sup>  |               |              | 0.164 <sup>b</sup> |
| Normal β-cell function (76.25-<br>122.13) | 5<br>(29.4%)  | 3<br>(30.0%) |                     | 14<br>(77.8%) | 4 (57.1%)    |                    |
| β-cell dysfunction (≤76.25)               | 11<br>(64.7%) | 3<br>(30.0%) |                     | 2 (11.1%)     | 3 (42.9%)    |                    |
| β-cell excessive function<br>(≥122.13)    | 1<br>(5.9%)   | 4<br>(40.0%) |                     | 2 (11.1%)     | 0            |                    |
| FIRI                                      |               |              | <0.001 <sup>a</sup> |               |              | 0.002 <sup>a</sup> |
| Normal (≤0.77)                            | 13<br>(76.5%) | 0            |                     | 13<br>(72.2%) | 0            |                    |
| IR (>0.77)                                | 4<br>(23.5%)  | 10<br>(100%) |                     | 5 (27.8%)     | 7<br>(100%)  |                    |
| QUICKI                                    |               |              | 0.012 <sup>a</sup>  |               |              | 0.280 <sup>a</sup> |
| Normal (>0.339)                           | 17<br>(100%)  | 6<br>(60.0%) |                     | 18 (100%)     | 6 (85.7%)    |                    |
| IR (≤0.339)                               | 0             | 4<br>(40.0%) |                     | 0             | 1 (14.3%)    |                    |

<sup>a</sup>Fisher exact test; <sup>b</sup> $\chi^2$  test. BMI, body mass index; SBP, systolic blood pressure; DBP, diastolic blood pressure; FPG, fasting plasma glucose; FIL, fasting insulin level; HOMA-IR, homeostatic model assessment of insulin resistance; HOMA-β, homeostasis model assessment of β-cell dysfunction; FIRI, fasting insulin resistance index; QUICKI, quantitative insulin sensitivity check index.

Table SII. Comparison of clinical characteristics of patients and metabolic parameters between two classes of body mass index among benign and malignant ovarian neoplasms (in the form of categorical data).

| Variable                                           | Benign neoplasms        |                       | P-value             | Malignant neoplasms     |                       | P-value             |
|----------------------------------------------------|-------------------------|-----------------------|---------------------|-------------------------|-----------------------|---------------------|
|                                                    | Normal +<br>underweight | Obese +<br>overweight |                     | Normal +<br>underweight | Obese +<br>overweight |                     |
| Young/old age (years)                              |                         |                       | 0.581 <sup>a</sup>  |                         |                       | >0.999 <sup>b</sup> |
| Young ( $\leq 40$ )                                | 9 (64.3%)               | 7 (53.8%)             |                     | 6 (30.0%)               | 1 (20.0%)             |                     |
| Old ( $> 40$ )                                     | 5 (35.7%)               | 6 (46.2%)             |                     | 14 (70.0%)              | 4 (80.0%)             |                     |
| Marital status                                     |                         |                       | 0.596 <sup>b</sup>  |                         |                       | 0.504 <sup>b</sup>  |
| Married                                            | 11 (78.6%)              | 12 (92.3%)            |                     | 18 (90.0%)              | 4 (80.0%)             |                     |
| Unmarried                                          | 3 (21.4%)               | 1 (7.7%)              |                     | 2 (10.0%)               | 1 (20.0%)             |                     |
| Parity status                                      |                         |                       | >0.999 <sup>a</sup> |                         |                       | 0.283 <sup>b</sup>  |
| Non-parous                                         | 5 (35.7%)               | 4 (30.8%)             |                     | 5 (25.0%)               | 3 (60.0%)             |                     |
| Parous                                             | 9 (64.3%)               | 9 (69.2%)             |                     | 15 (75.0%)              | 2 (40.0%)             |                     |
| Menopausal status                                  |                         |                       | 0.648 <sup>b</sup>  |                         |                       | 0.645 <sup>b</sup>  |
| Yes                                                | 4 (28.6%)               | 2 (15.4%)             |                     | 11 (55.0%)              | 2 (40.0%)             |                     |
| No                                                 | 10 (71.4%)              | 11 (84.6%)            |                     | 9 (45.0%)               | 3 (60.0%)             |                     |
| Contraception type                                 |                         |                       | >0.999 <sup>b</sup> |                         |                       | >0.999 <sup>b</sup> |
| None + Non-hormonal                                | 11 (78.6%)              | 11 (84.6%)            |                     | 13 (65.0%)              | 4 (80.0%)             |                     |
| Hormonal                                           | 3 (21.4%)               | 2 (15.4%)             |                     | 7 (35.0%)               | 1 (20.0%)             |                     |
| Ovarium side affected                              |                         |                       | 0.582 <sup>a</sup>  |                         |                       | 0.910 <sup>a</sup>  |
| Left side                                          | 3 (21.4%)               | 2 (15.4%)             |                     | 6 (30.0%)               | 2 (40.0%)             |                     |
| Right side                                         | 4 (28.6%)               | 2 (15.4%)             |                     | 9 (45.0%)               | 2 (40.0%)             |                     |
| Bilateral                                          | 7 (50.0%)               | 9 (69.2%)             |                     | 5 (25.0%)               | 1 (20.0%)             |                     |
| SBP (mmHg)                                         |                         |                       | 0.770 <sup>a</sup>  |                         |                       | 0.215 <sup>a</sup>  |
| Normal ( $< 130$ )                                 | 8 (57.1%)               | 9 (69.2%)             |                     | 10 (50.0%)              | 1 (20.0%)             |                     |
| High-normal (130–139)                              | 5 (35.7%)               | 3 (23.1%)             |                     | 4 (20.0%)               | 0                     |                     |
| Grade I (140–159)                                  | 1 (7.2%)                | 1 (7.7%)              |                     | 5 (25.0%)               | 3 (60.0%)             |                     |
| Grade II ( $\geq 160$ )                            | 0                       | 0                     |                     | 1 (5.0%)                | 1 (20.0%)             |                     |
| DBP (mmHg)                                         |                         |                       | 0.176 <sup>a</sup>  |                         |                       | 0.009 <sup>a</sup>  |
| Normal ( $< 85$ )                                  | 10 (71.4%)              | 8 (61.5%)             |                     | 13 (65.0%)              | 0                     |                     |
| High-normal (85–89)                                | 2 (14.3%)               | 5 (38.5%)             |                     | 2 (10.0%)               | 4 (80.0%)             |                     |
| Grade I (90–99)                                    | 2 (14.3%)               | 0                     |                     | 4 (20.0%)               | 1 (20.0%)             |                     |
| Grade II ( $\geq 100$ )                            | 0                       | 0                     |                     | 1 (5.0%)                | 0                     |                     |
| Hypertension status                                |                         |                       | 0.385 <sup>b</sup>  |                         |                       | 0.039 <sup>b</sup>  |
| No                                                 | 9 (64.3%)               | 11 (84.6%)            |                     | 12 (60.0%)              | 0                     |                     |
| Yes                                                | 5 (35.7%)               | 2 (15.4%)             |                     | 8 (40.0%)               | 5 (100%)              |                     |
| FPG (mg/dL)                                        |                         |                       | >0.999 <sup>b</sup> |                         |                       | 0.392 <sup>a</sup>  |
| Normal ( $< 100$ )                                 | 12 (85.7%)              | 12 (92.3%)            |                     | 15 (75.0%)              | 3 (60.0%)             |                     |
| Moderate (100–125)                                 | 2 (14.3%)               | 1 (7.7%)              |                     | 3 (15.0%)               | 2 (40.0%)             |                     |
| High ( $\geq 126$ )                                | 0                       | 0                     |                     | 2 (10.0%)               | 0                     |                     |
| FIL ( $\mu\text{IU/mL}$ )                          |                         |                       | 0.678 <sup>b</sup>  |                         |                       | 0.091 <sup>b</sup>  |
| Normal ( $< 7$ )                                   | 11 (78.6%)              | 9 (69.2%)             |                     | 19 (95.0%)              | 3 (60.0%)             |                     |
| IR ( $\geq 7$ )                                    | 3 (21.4%)               | 4 (30.8%)             |                     | 1 (5.0%)                | 2 (40%)               |                     |
| HOMA- $\beta$ (%)                                  |                         |                       | 0.089 <sup>a</sup>  |                         |                       | 0.041 <sup>a</sup>  |
| Normal $\beta$ -cell function (76.25–122.13)       | 10 (71.4%)              | 4 (30.8%)             |                     | 16 (80.0%)              | 2 (40.0%)             |                     |
| $\beta$ -cell dysfunction ( $\leq 76.25$ )         | 3 (21.4%)               | 5 (38.4%)             |                     | 2 (10.0%)               | 3 (60.0%)             |                     |
| $\beta$ -cell excessive function ( $\geq 122.13$ ) | 1 (7.1%)                | 4 (30.8%)             |                     | 2 (10.0%)               | 0                     |                     |
| FIRI                                               |                         |                       | 0.568 <sup>a</sup>  |                         |                       | 0.160 <sup>b</sup>  |
| Normal ( $\leq 0.77$ )                             | 6 (42.9%)               | 7 (53.8%)             |                     | 12 (60.0%)              | 1 (20.0%)             |                     |
| IR ( $> 0.77$ )                                    | 8 (57.1%)               | 6 (46.2%)             |                     | 8 (40.0%)               | 4 (80.0%)             |                     |

|                 |            |            |                    |           |           |                    |
|-----------------|------------|------------|--------------------|-----------|-----------|--------------------|
| QUICKI          |            |            | 0.326 <sup>b</sup> |           |           | 0.200 <sup>b</sup> |
| Normal (>0.339) | 13 (92.9%) | 10 (76.9%) |                    | 20 (100%) | 4 (80.0%) |                    |
| IR (≤0.339)     | 1 (7.1%)   | 3 (23.1%)  |                    | 0         | 1 (20.0%) |                    |

<sup>a</sup> $\chi^2$  test; <sup>b</sup>Fisher exact test. BMI, body mass index; SBP, systolic blood pressure; DBP, diastolic blood pressure; FPG, fasting plasma glucose; FIL, fasting insulin level; IR, insulin resistance; HOMA-IR, homeostatic model assessment of insulin resistance; HOMA- $\beta$ , homeostasis model assessment of  $\beta$ -cell dysfunction; FIRI, fasting insulin resistance index; QUICKI, quantitative insulin sensitivity check index.

Table SIII. Comparison of patient's clinical characteristics and metabolic parameters among the different histopathological types of malignant ovarian neoplasms (in the form of categorical data).

| Variables                                           | Pathology of malignant ovarian neoplasm |                      |                 |                        |                  |             | P-value <sup>a</sup> |
|-----------------------------------------------------|-----------------------------------------|----------------------|-----------------|------------------------|------------------|-------------|----------------------|
|                                                     | Mucinous carcinoma                      | Clear cell carcinoma | Adeno-carcinoma | Endometrioid carcinoma | Serous carcinoma | Mixed type  |                      |
| Young/old age (years)                               |                                         |                      |                 |                        |                  |             | 0.242                |
| Young ( $\leq 40$ )                                 | 3<br>(30.0%)                            | 1<br>(16.7%)         | 3<br>(75.0%)    | 0                      | 0                | 0           |                      |
| Old ( $> 40$ )                                      | 7<br>(70.0%)                            | 5<br>(83.3%)         | 1<br>(25.0%)    | 2<br>(100%)            | 2<br>(100%)      | 1<br>(100%) |                      |
| Menopausal status                                   |                                         |                      |                 |                        |                  |             | 0.303                |
| Yes                                                 | 4<br>(40.0%)                            | 2<br>(33.3%)         | 2<br>(50.0%)    | 2 (100.0%)             | 2<br>(100%)      | 1<br>(100%) |                      |
| No                                                  | 6<br>(60.0%)                            | 4<br>(66.7%)         | 2<br>(50.0%)    | 0                      | 0                | 0           |                      |
| SBP (mmHg)                                          |                                         |                      |                 |                        |                  |             | 0.873                |
| Normal ( $< 130$ )                                  | 3<br>(30.0%)                            | 3<br>(50.0%)         | 3<br>(75.0%)    | 1<br>(50.0%)           | 1<br>(50.0%)     | 0           |                      |
| High-normal (130-139)                               | 2<br>(20.0%)                            | 1<br>(16.7%)         | 1<br>(25.0%)    | 0                      | 0                | 0           |                      |
| Grade I (140-159)                                   | 3<br>(30.0%)                            | 2<br>(33.3%)         | 0               | 1<br>(50.0%)           | 1<br>(50.0%)     | 1<br>(100%) |                      |
| Grade II ( $\geq 160$ )                             | 2<br>(20.0%)                            | 0                    | 0               | 0                      | 0                | 0           |                      |
| DBP (mmHg)                                          |                                         |                      |                 |                        |                  |             | 0.797                |
| Normal ( $< 85$ )                                   | 5<br>(50.0%)                            | 3<br>(50.0%)         | 3<br>(75.0%)    | 1<br>(50.0%)           | 1<br>(50.0%)     | 0           |                      |
| High-normal (85-89)                                 | 3<br>(30.0%)                            | 1<br>(16.7%)         | 1<br>(25.0%)    | 0                      | 1<br>(50.0%)     | 0           |                      |
| Grade I (90-99)                                     | 1<br>(10.0%)                            | 2<br>(33.3%)         | 0               | 1<br>(50.0%)           | 0                | 1<br>(100%) |                      |
| Grade II ( $\geq 100$ )                             | 1<br>(10.0%)                            | 0                    | 0               | 0                      | 0                | 0           |                      |
| BMI Asia-Pacific classification ( $\text{kg/m}^2$ ) |                                         |                      |                 |                        |                  |             | 0.818                |
| $< 18.5$ (Underweight)                              | 4<br>(40.0%)                            | 2<br>(33.3%)         | 2<br>(50.0%)    | 1<br>(50.0%)           | 1<br>(50.0%)     | 1<br>(100%) |                      |
| 18.5-22.9 (Normal)                                  | 3<br>(30.0%)                            | 3<br>(50.0%)         | 2<br>(50.0%)    | 1<br>(50.0%)           | 0                | 0           |                      |
| 23-24.9 (Overweight)                                | 1<br>(10.0%)                            | 0                    | 0               | 0                      | 1<br>(50.0%)     | 0           |                      |
| $\geq 25$ (Obese)                                   | 0                                       | 1<br>(16.7%)         | 0               | 0                      | 0                | 0           |                      |
| BMI class                                           |                                         |                      |                 |                        |                  |             | 0.617                |
| Lower-class BMI (normal + underweight)              | 7<br>(70.0%)                            | 5<br>(83.3%)         | 4<br>(100%)     | 2<br>(100%)            | 1<br>(50.0%)     | 1<br>(100%) |                      |
| Higher-class BMI (overweight + obese)               | 3<br>(30.0%)                            | 1<br>(16.7%)         | 0               | 0                      | 1<br>(50.0%)     | 0           |                      |
| FPG (mg/dL)                                         |                                         |                      |                 |                        |                  |             | 0.150                |
| Normal ( $< 100$ )                                  | 7<br>(70.0%)                            | 4<br>(66.7%)         | 3<br>(75.0%)    | 2<br>(100%)            | 2<br>(100%)      | 0           |                      |
| Moderate (100-125)                                  | 2<br>(20.0%)                            | 2<br>(33.3%)         | 1<br>(25.0%)    | 0                      | 0                | 0           |                      |
| High ( $\geq 126$ )                                 | 1                                       | 0                    | 0               | 0                      | 0                | 1           |                      |

|                                       |              |              |              |             |              |             |              |
|---------------------------------------|--------------|--------------|--------------|-------------|--------------|-------------|--------------|
|                                       | (10.0%)      |              |              |             |              | (100%)      |              |
| <b>FIL (μIU/mL)</b>                   |              |              |              |             |              |             | <b>0.384</b> |
| Normal (<7)                           | 10<br>(100%) | 5<br>(83.3%) | 3<br>(75.0%) | 2<br>(100%) | 1<br>(50.0%) | 1<br>(100%) |              |
| IR (≥7)                               | 0            | 1<br>(16.7%) | 1<br>(25.0%) | 0           | 1<br>(50.0%) | 0           |              |
| <b>HOMA-IR</b>                        |              |              |              |             |              |             | <b>0.101</b> |
| Normal (<1.208)                       | 8<br>(80.0%) | 5<br>(83.3%) | 3<br>(75.0%) | 2<br>(100%) | 0            | 0           |              |
| IR (≥1.208)                           | 2<br>(20.0%) | 1<br>(16.7%) | 1<br>(25.0%) | 0           | 2<br>(100%)  | 1<br>(100%) |              |
| <b>HOMA-β (%)</b>                     |              |              |              |             |              |             | <b>0.620</b> |
| Normal β-cell function (76.25-122.13) | 8<br>(80.0%) | 5<br>(83.3%) | 1<br>(25.0%) | 2<br>(100%) | 1<br>(50.0%) | 1<br>(100%) |              |
| β-cell dysfunction (≤76.25)           | 1<br>(10.0%) | 1<br>(16.7%) | 2<br>(50.0%) | 0           | 1<br>(50.0%) | 0           |              |
| β-cell excessive function (≥122.13)   | 1<br>(10.0%) | 0            | 1<br>(25.0%) | 0           | 0            | 0           |              |
| <b>FIRI</b>                           |              |              |              |             |              |             | <b>0.218</b> |
| Normal (≤0.77)                        | 6<br>(60.0%) | 4<br>(66.7%) | 1<br>(25.0%) | 2<br>(100%) | 0            | 0           |              |
| IR (>0.77)                            | 4<br>(40.0%) | 2<br>(33.3%) | 3<br>(75.0%) | 0           | 2<br>(100%)  | 1<br>(100%) |              |
| <b>QUICKI</b>                         |              |              |              |             |              |             | <b>0.654</b> |
| Normal (>0.339)                       | 10<br>(100%) | 5<br>(83.3%) | 4<br>(100%)  | 2<br>(100%) | 2<br>(100%)  | 1<br>(100%) |              |
| IR (≤0.339)                           | 0            | 1<br>(16.7%) | 0            | 0           | 0            | 0           |              |

<sup>a</sup>P-value indicated the statistical differences between the six pathology types of malignant ovarian neoplasm using the  $\chi^2$  test. BMI, body mass index; SBP, systolic blood pressure; DBP, diastolic blood pressure; FPG, fasting plasma glucose; FIL, fasting insulin level; HOMA-IR, homeostatic model assessment of insulin resistance; HOMA-β, homeostasis model assessment of β-cell dysfunction; FIRI, fasting insulin resistance index; QUICKI, quantitative insulin sensitivity check index.
